# Supplementary material
Source: publisher figshare collection journal article supplement (https://acs.figshare.com/ndownloader/files/4389331)
Supplement: Supplementary file 1 [file 4389331]

## Supporting Information

### Electronic Structure of Highly Ruffled Low-Spin Iron(III) Porphyrinates with Electron Withdrawing Heptafluoropropyl Groups at the meso Positions

Akira Tozuka, Yoshiki Ohgo, Akira Ikezaki, Miyoko Taniguchi, and Mikio Nakamura\*

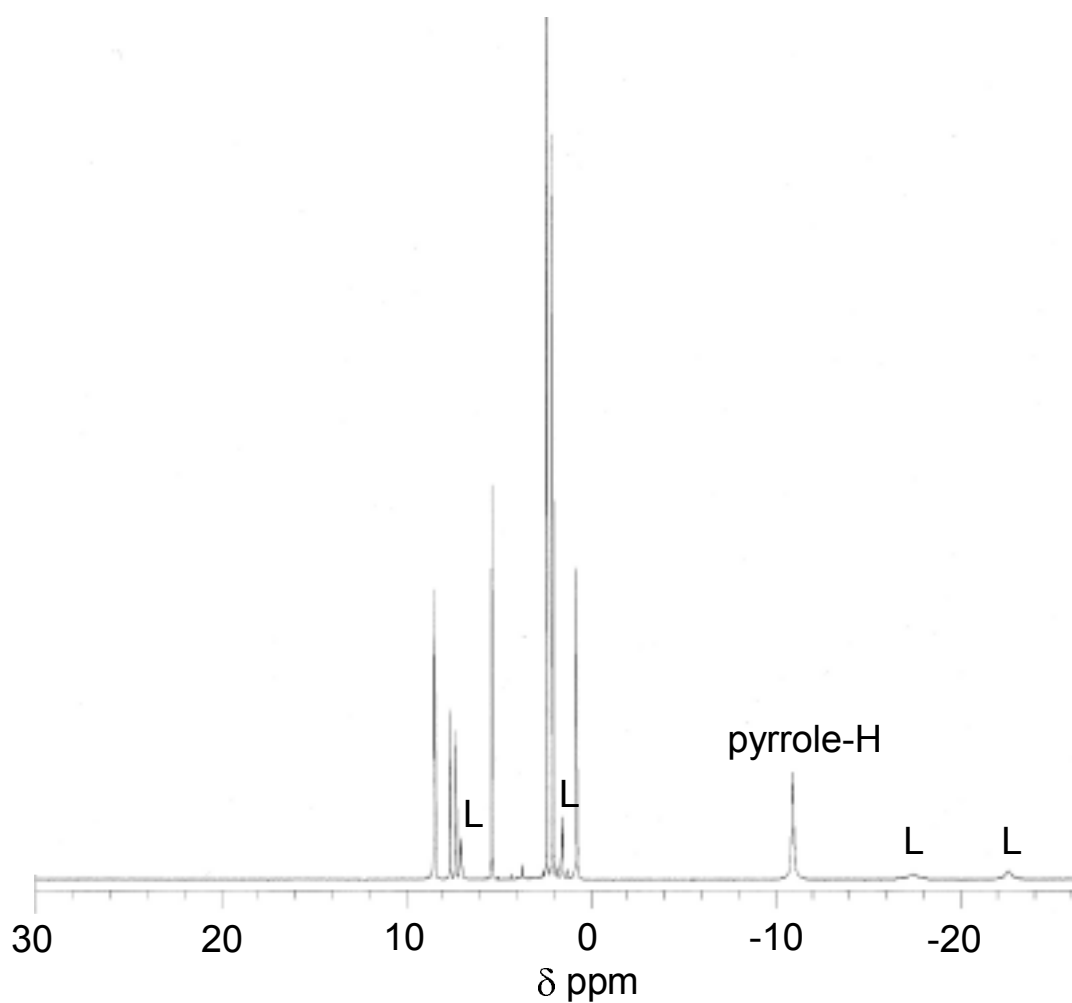

**Figure S1.**  $^1\text{H}$  NMR spectrum of  $[\text{Fe}(\text{THFPrP})(3\text{-MePy})_2]^+$  taken in  $\text{CD}_2\text{Cl}_2$  at 298 K.
